# Supplementary material
Source: publisher figshare collection journal article supplement (https://tandf.figshare.com/ndownloader/files/28365784)
Supplement: Supplementary file 1 [file 28365784]

***Table S1*: *Satellite sensor and data specifications.***

| **Sensor** | **Time period (for this study)** | **Spatial resolution (m)** | **Temporal resolution (days)** | **Spectral band (wavelength)** |
| --- | --- | --- | --- | --- |
| Landsat 5 TM | 1985-1999 | 30 | 16 | Band 4 (0.76-0.90 µm) |
| Landsat 7 ETM+ | 1999-2003 | 30 | 16 | Band 4 (0.77-0.90 µm) |
| Landsat 8 OLI | 2013-2015 | 30 | 16 | Band 5 (0.85-0.88 µm) |
| Sentinel-2A MSI | 2016-2019 | 10 | 10 | Band 8 (0.83 µm) |
| Sentinel-2B MSI | 2017-2019 | 10 | 10 | Band 8 (0.83 µm) |

***Table S2:*** *Modeled optimal shorefast ice travel distances and durations between Uummannaq and five surrounding communities, for the months of March, April, and May averaged over 1985 through 2019.*

| **Route destination** | **March** | | | | | | **April** | | | | | | **May** | | | | | |
| --- | --- | --- | --- | --- | --- | --- | --- | --- | --- | --- | --- | --- | --- | --- | --- | --- | --- | --- |
| **Distance (km)** | | | **Duration(min)** | | | **Distance (km)** | | | **Duration (min)** | | | **Distance (km)** | | | **Duration (min)** | | |
| **Mean** | **Max** | **Min** | **Mean** | **Max** | **Min** | **Mean** | **Max** | **Min** | **Mean** | **Max** | **Min** | **Mean** | **Max** | **Min** | **Mean** | **Max** | **Min** |
| Ikerasak | 40.8 | 55.0 | 39.0 | 68.4 | 94.8 | 58.8 | 40.5 | 61.9 | 39.0 | 64.8 | 93.6 | 58.8 | 40.8 | 50.1 | 39.1 | 84.6 | 95.4 | 58.6 |
| Niaqornat | 69.8 | 87.1 | 64.0 | 117 | 173.4 | 96 | 67.7 | 92.6 | 63.9 | 110.4 | 154.2 | 96 | 68.0 | 84.7 | 64.0 | 124.8 | 153.6 | 96.8 |
| Qaarsut | 24.0 | 28.9 | 23.2 | 42 | 55.8 | 34.8 | 24.8 | 34.7 | 23.2 | 40.8 | 57 | 34.8 | 23.9 | 27.0 | 23.2 | 47.4 | 58.8 | 35.1 |
| Saattut | 35.4 | 75.2 | 26.6 | 60 | 132 | 39.6 | 30.0 | 63.7 | 26.5 | 47.4 | 97.8 | 39.6 | 27.5 | 35.7 | 26.5 | 56.4 | 64.8 | 40 |
| Ukkusissat | 59.7 | 97.1 | 51.2 | 99 | 153 | 76.8 | 56.0 | 87.4 | 51.2 | 88.8 | 133.2 | 76.8 | 55.0 | 76.6 | 51.2 | 110.4 | 135.6 | 77 |


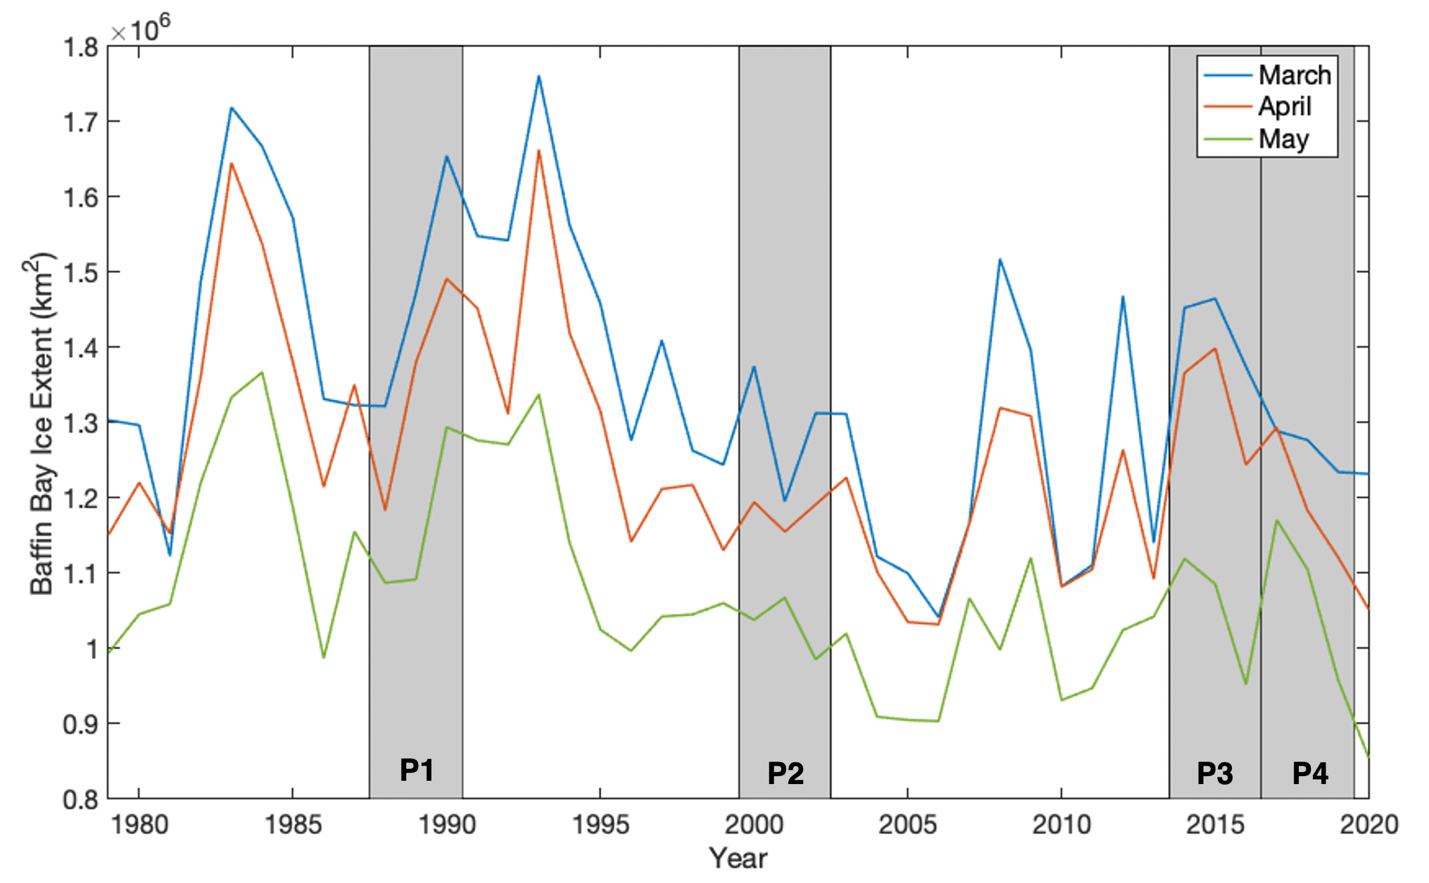


***Figure S1****: Trends in Baffin Bay sea ice extent in March (blue line), April (red) and May (green) over the passive microwave satellite record (NSIDC Sea Ice Index:* *https://nsidc.org/data/seaice_index). The four time periods examined in this study are shaded gray.*


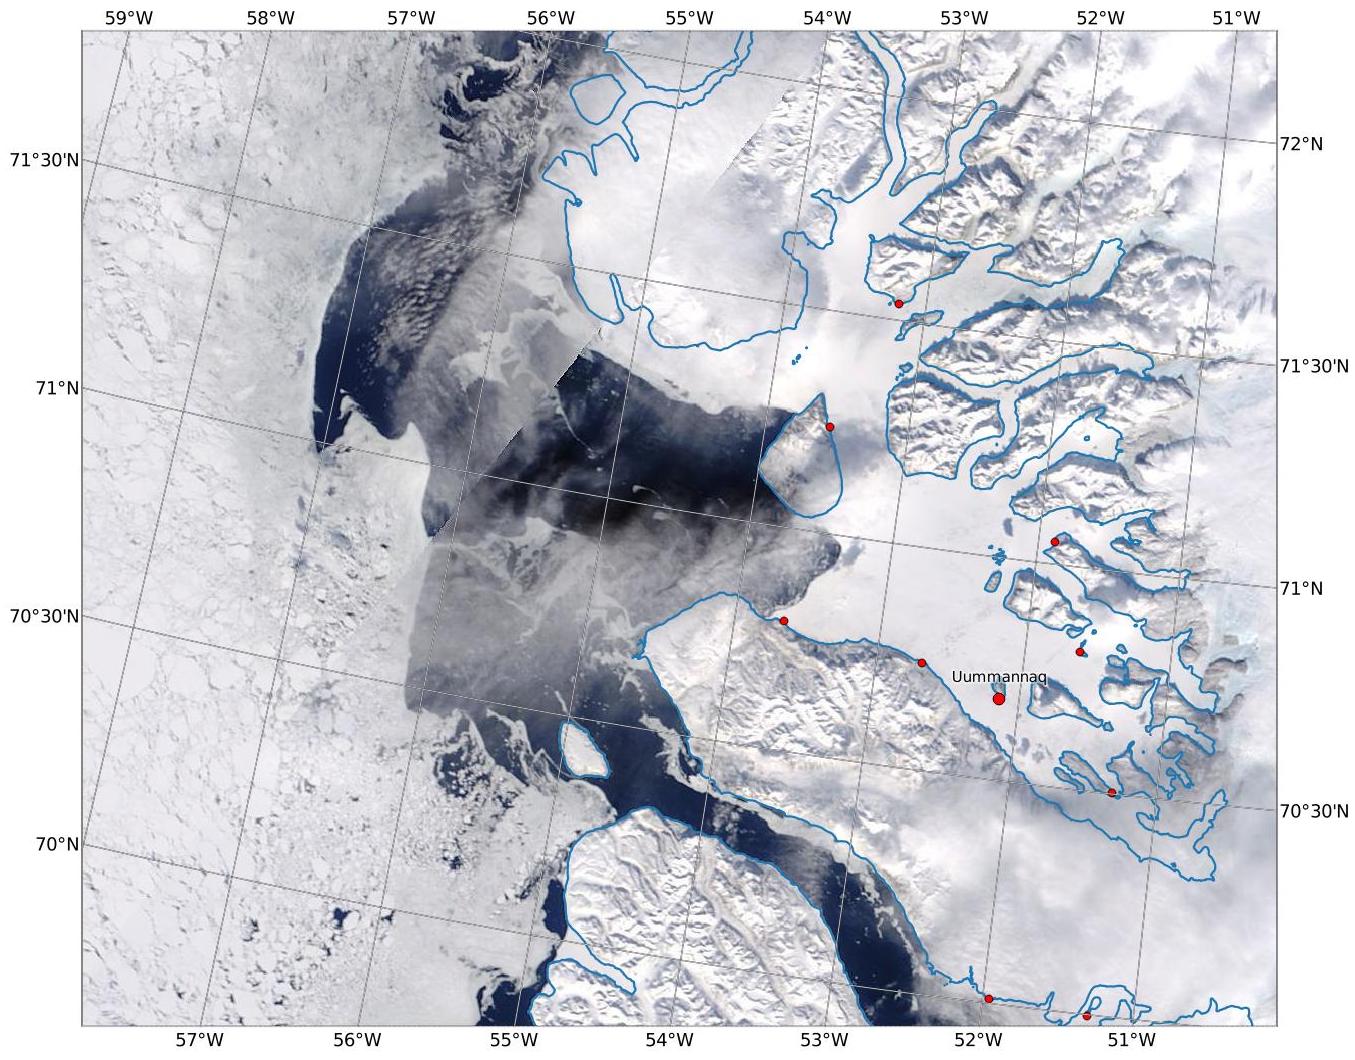


***Figure S2****: MODIS-Terra satellite image of Uummannaq Fjord on April 6, 2019 illustrating the location of the ice edge. Red dots indicate community locations. Source: NASA Goddard Space Flight Center, http://ocean.dmi.dk/arctic/uummannaq.uk.php*
